# Supplementary material for: Identification of regulatory elements required for Stra8 expression in fetal ovarian germ cells of the mouse
Source: Oxford University Press journal article supplement (doi:10.1242/dev.194977), 2021-02-11
Supplement: dev194977supp.pdf [file dev194977supp.pdf]

## Supplementary Information

Supplementary Figures  
Figure S1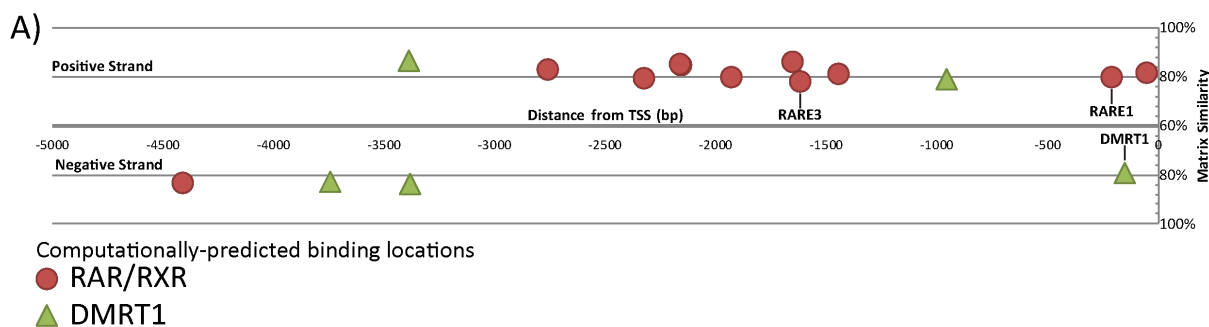

| Transcription Factor Matrix                              | Start position | End position | Strand | Matrix sim. | Sequence                  |
|----------------------------------------------------------|----------------|--------------|--------|-------------|---------------------------|
| Retinoic acid receptor / retinoid X receptor heterodimer | -4418          | -4394        | -      | 0.833       | AGGAGGATCGTTGCCAGTTCAAGAA |
|                                                          | -2774          | -2750        | +      | 0.831       | ACTCCTCTGGCTCAGAGGTCTTTAG |
|                                                          | -2337          | -2313        | +      | 0.797       | ACAAACCAGGACCAAAGGACATTGA |
|                                                          | -2176          | -2152        | +      | 0.856       | CAGGGATGCGGTCATAGGCCACAGG |
|                                                          | -2169          | -2145        | +      | 0.852       | GCGGTCATAGGCCACAGGGCATACG |
|                                                          | -1942          | -1918        | +      | 0.799       | AAGTTCAAAGGATAGTGGTCATATG |
|                                                          | -1667          | -1643        | +      | 0.862       | GCTGAGACCTGTCAGAGGTCAAAGT |
|                                                          | -1634          | -1610        | +      | 0.785       | CTCCACATTCTCACAGGTCAAGGA  |
|                                                          | -1459          | -1435        | +      | 0.816       | AGAGTCAGAAGGGATAGGTCATGAC |
|                                                          | -221           | -197         | +      | 0.803       | CTGGATGGGGTGAAAAGGTCATCTT |
| Doublesex and mab-3 related transcription factor 1       | -65            | -41          | +      | 0.817       | GCAGCCTGGGGTACCAGGTCAATTT |
|                                                          | -3754          | -3734        | -      | 0.828       | GTGAGAAGGGACATTGTGGGA     |
|                                                          | -3400          | -3380        | +      | 0.869       | GTATGTTGGCACACTGTATCC     |
|                                                          | -3394          | -3374        | -      | 0.833       | GGCTGGGGATACAGTGTGCCA     |
|                                                          | -968           | -948         | +      | 0.793       | AATTTAAGGTACCCTGTTGCA     |
|                                                          | -161           | -141         | -      | 0.789       | ATTGGTGAACATTGTAACA       |

**Figure S1: Computational prediction of RAR/RXR and DMRT1 binding sites 5kb upstream of *Stra8* TSS using MatInspector.**

Graphical representation of the location of putative RAR/RXR (red circle) and DMRT1 (green triangle) binding sites in relation to TSS of *Stra8*. Identified binding sites on the positive strand and negative strands are shown above and below the midline respectively. Putative binding sites are called when matrix similarity is  $>0.75$ , and this is indicated by their distance away from the midline; sites further away have higher similarity scores. Binding sites corresponding to RARE1, RARE3 and DMRT1 examined in this study are also indicated.

## Figure S2

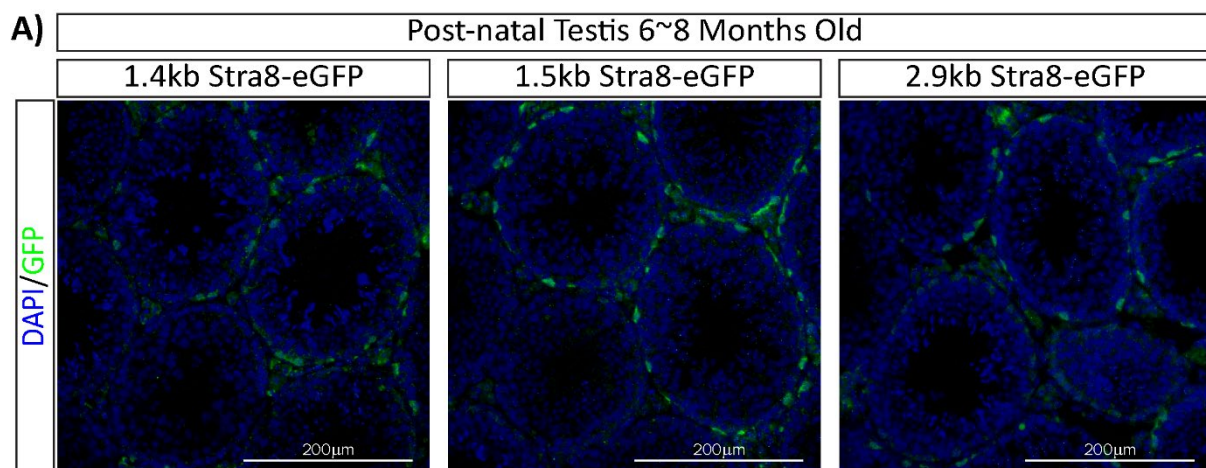

**Figure S2: Testicular expression of eGFP is similar among in all three *Stra8* promoter lines.** Immunofluorescent analysis of adult testis for eGFP expression shows that, in all three lines, GFP is detectable in a pattern similar to that observed in previous studies (Giuli et al., 2002; Sadate-Ngatchou et al., 2008).

Figure S3

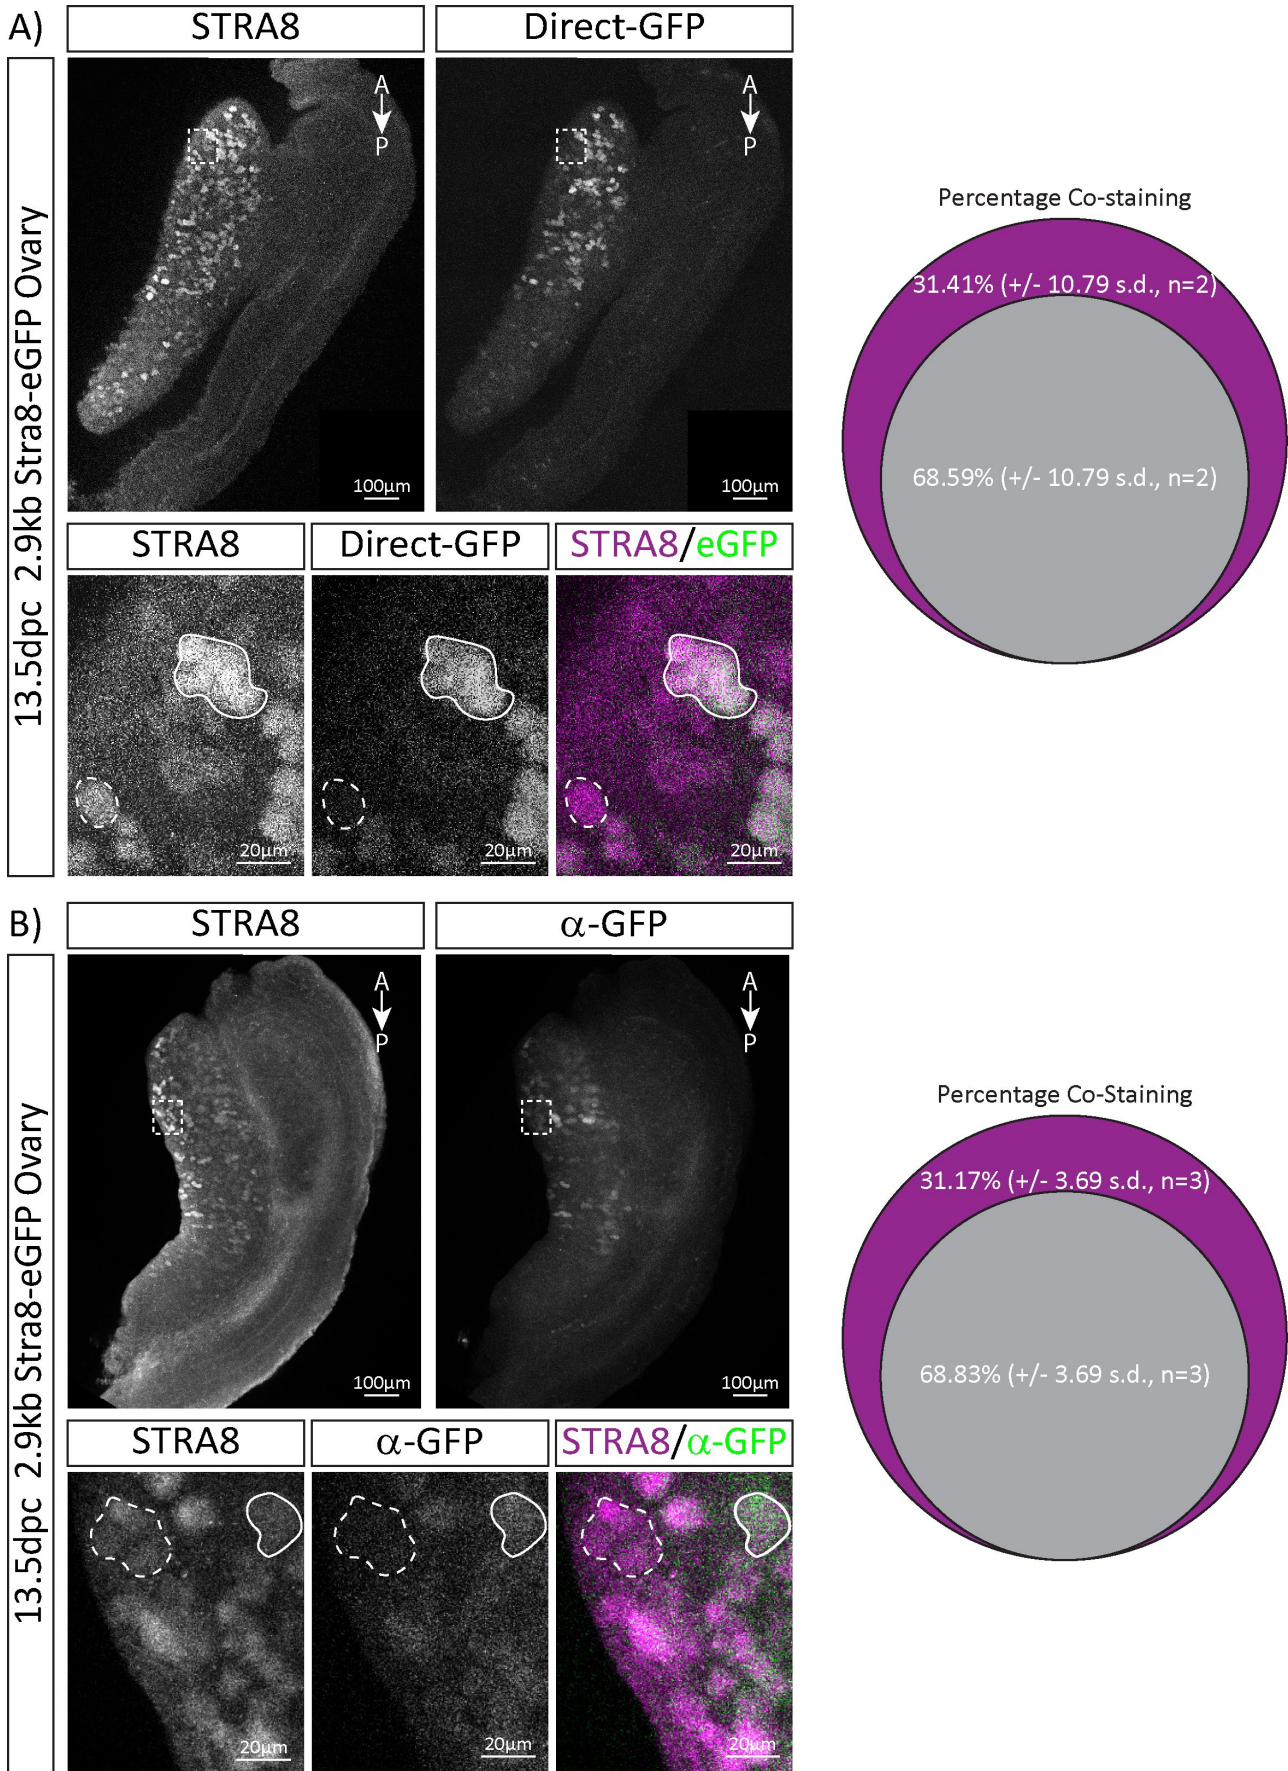

Figure S3: eGFP driven by the 2.9kb *Stra8* promoter co-localises with STRA8 protein expression in approximately 68% of germ cells.

A) Whole mount immunofluorescence analysis of 13.5 dpc 2.9kb Stra8-eGFP ovaries stained for STRA8 expression, compared to direct eGFP signal produced. Cells co-expressing STRA8/eGFP (solid lined) accounted for 68.59% (+/- 10.79 s.d, n=2, 348 total cells counted) of total STRA8-positive cells (dotted lined). No cells expressing eGFP only were observed. B) Whole mount immunofluorescence analysis of 13.5 dpc 2.9kb Stra8-eGFP ovaries stained for STRA8 expression, compared to anti-GFP antibody detection. Cells co-staining for STRA8/anti-GFP (solid lined) accounted for 68.83% (+/- 3.69 s.d, n=3, 653 total cells counted) of total STRA8-positive cells (dotted lined). No cells staining for GFP only were observed.

Figure S4

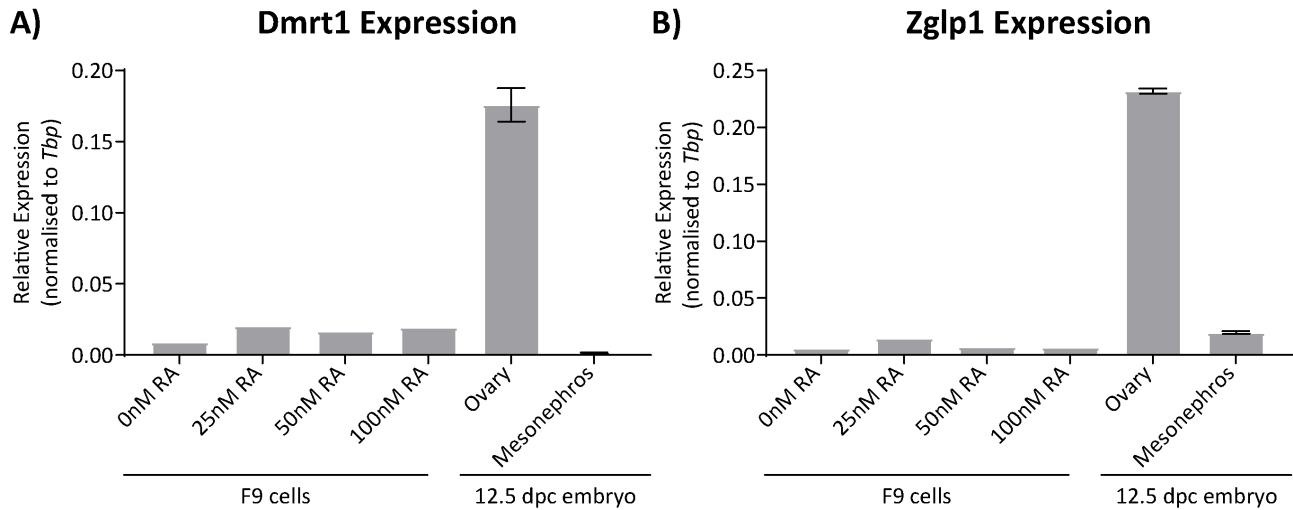Figure S4: Lack of *Dmrt1* and *Zglp1* expression in F9 EC cells

A) *Dmrt1* is not present at appreciable levels in F9 cells and is not upregulated in response to RA, excluding a mechanism by which RA induces *Dmrt1* expression and DMRT1 drives *Stra8* expression (n = 1, see text for more detail). B) Downstream effector of BMP signalling, *Zglp1*, is not expressed in F9 cells and is not upregulated in response to RA treatment (n=1). Quantitation of expression in 12.5 dpc ovaries and mesonephros are included as positive and negative controls, respectively, for comparison (n=3).

## Figure S5

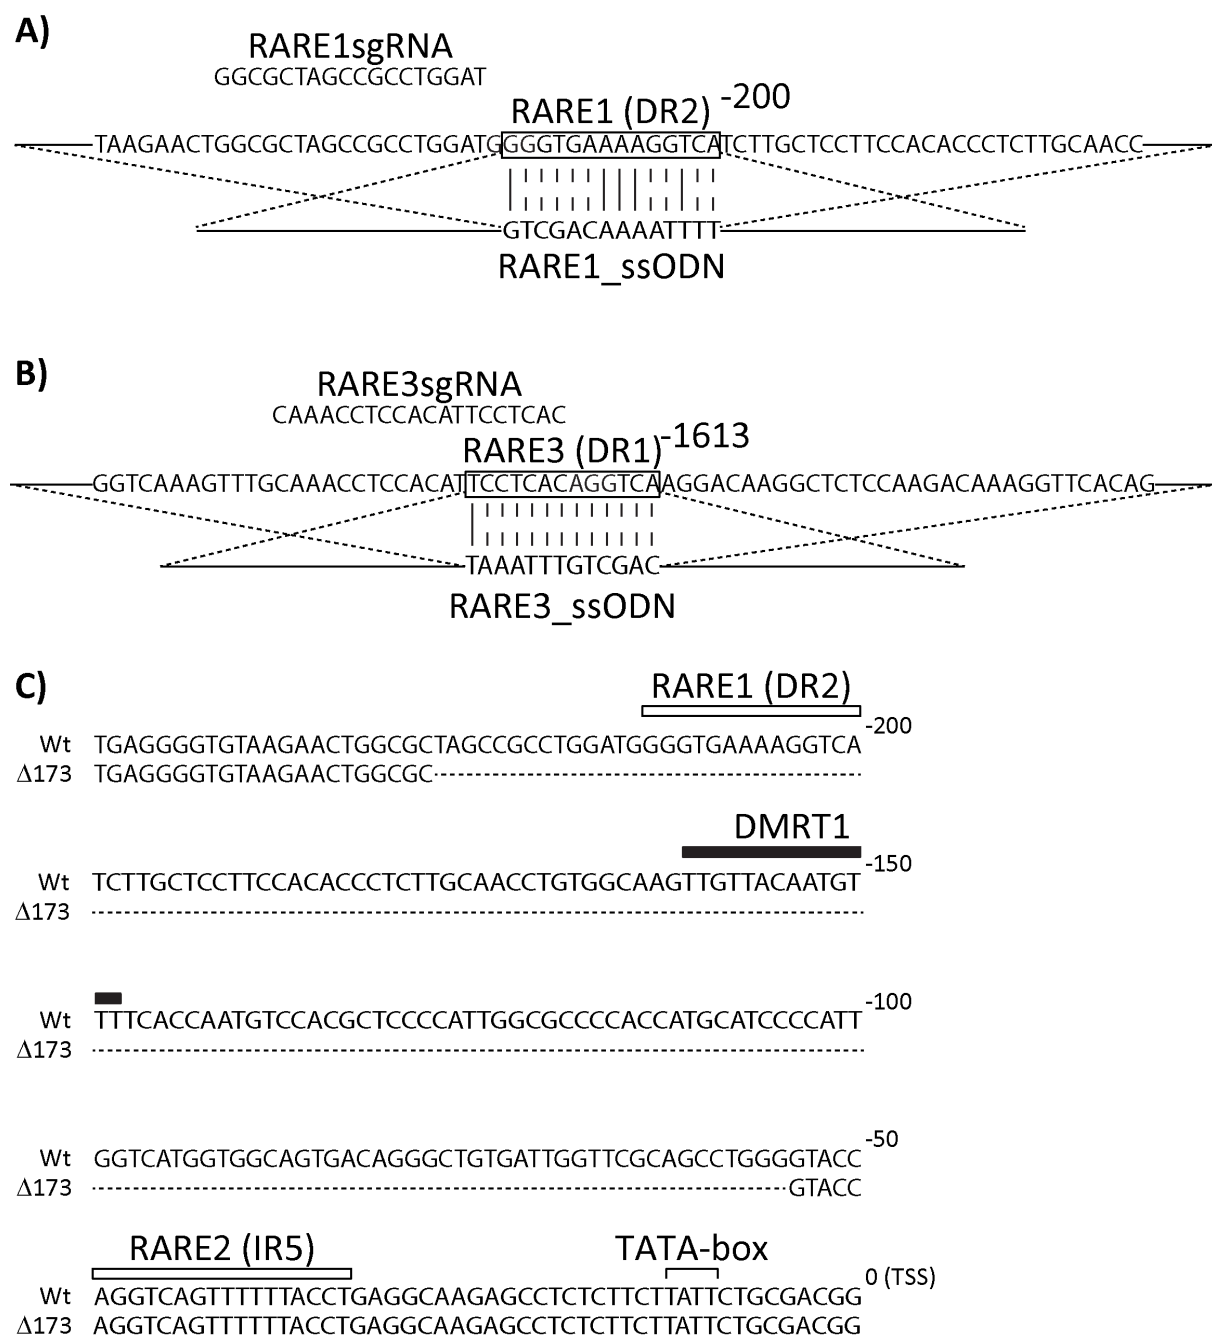

**Figure S5: CRISPR/Cas9 mutation strategy of RARE1 and RARE3.**

A) RARE1 specific CRISPR guide RNA (RARE1sgRNA) was designed to target RARE1 (black rectangle) at -200nt relative to *Stra8* TSS. Mutations to RARE1 are incorporated when the CRISPR/Cas9 mediated double stranded break is repaired by homology directed repair (HDR) using co-injected RARE1\_ssODN as the repair template. Target sequence was mutated to also disrupt the PAM recognition sequence, to prevent CRISPR/Cas9 re-targeting of successful HDR events. We included a *Sall* restriction enzyme site to facilitate genotyping. B) RARE3 at -1613nt was targeted for mutation using a similar strategy as for RARE1. C) An unplanned non-homologous end joining repair by-product of targeting RARE1 generated the mutant line  $\Delta$ 173bp, where sequence between -55 and -228nt upstream of *Stra8* TSS (encompassing RARE1 and DMRT1 binding sites) was deleted.

Previously identified RARE2 and a TATA-box like sequence remained intact. The  $\Delta 173\text{bp}$  is effectively a *Stra8*-null mouse line as both sexes are infertile.

## Figure S6

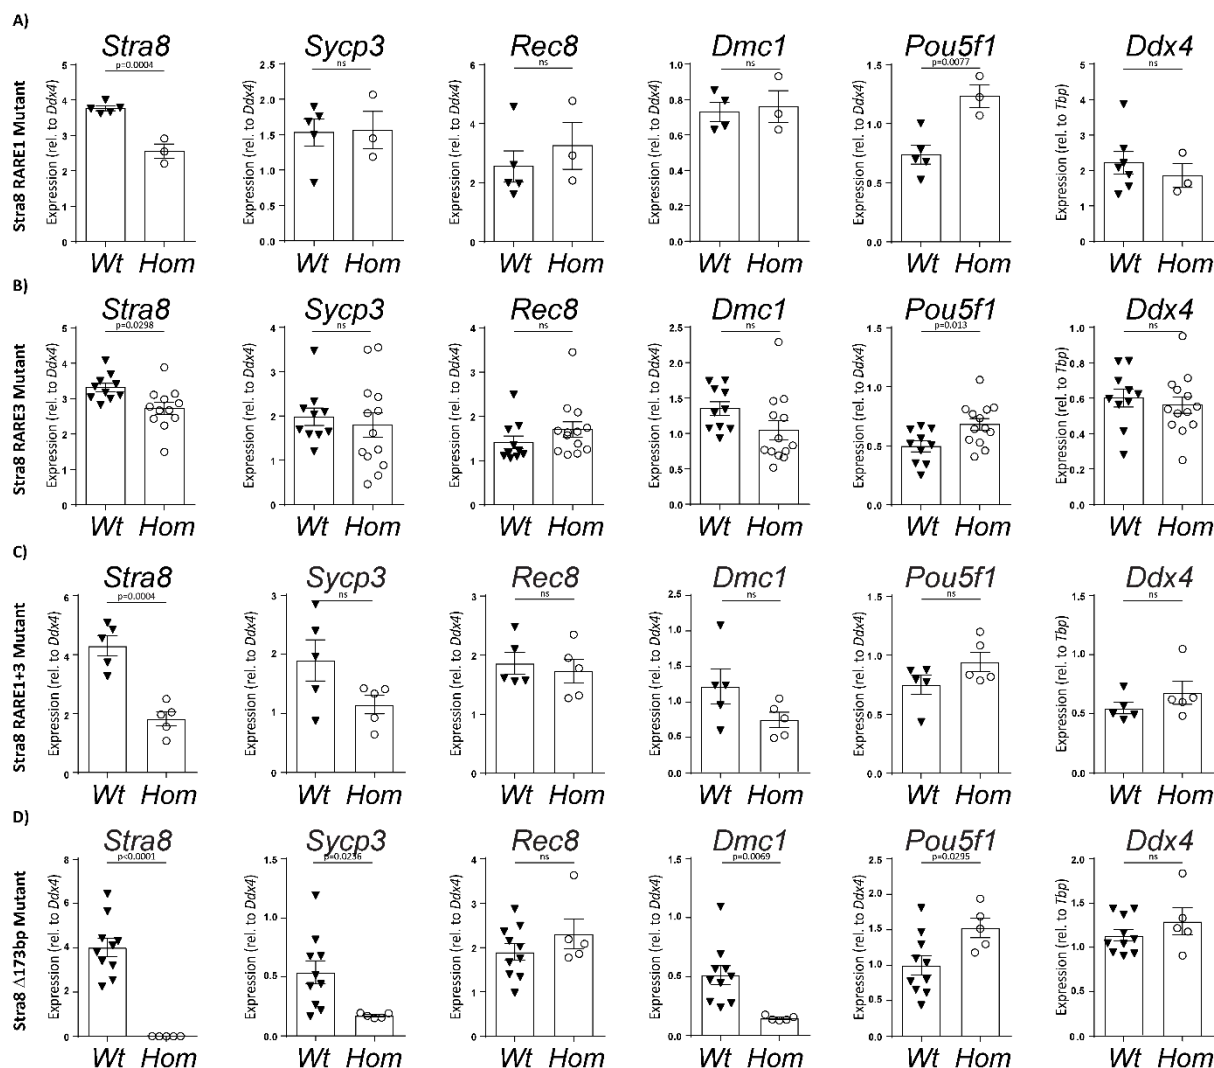

**Figure S6: Meiotic and germ cell gene expression in 14.5 dpc fetal ovaries of the CRISPR/Cas9 mutant mouse lines compared to wildtype littermates.**

A-C) RARE1, RARE3 and RARE1/3 mutant lines all show decreased *Stra8* expression by qRT-PCR, however other meiotic markers are not significantly perturbed. Importantly *Rec8*, another RA responsive gene, is unaffected indicating the decrease in *Stra8* expression is not due to lower levels of RA. Retention of *Pou5f1* expression is observed at varying degrees of magnitude. D) In the Δ173bp mutant there is no detectable expression of *Stra8* and expression of later stage meiotic markers *Sycp3* and *Dmc1* is substantially diminished. *Rec8* expression is not significantly altered in RARE1, RARE3 or RARE1/3 lines, as expected (mean ± s.e.m, t-test, n > 3).





Two representative images of whole mount immunofluorescence for STRA8 shows that the anterior to posterior pattern of STRA8 expression seen in wildtype ovaries (upper panels) is maintained in RARE1/3 double mutant (lower panels).

Figure S8

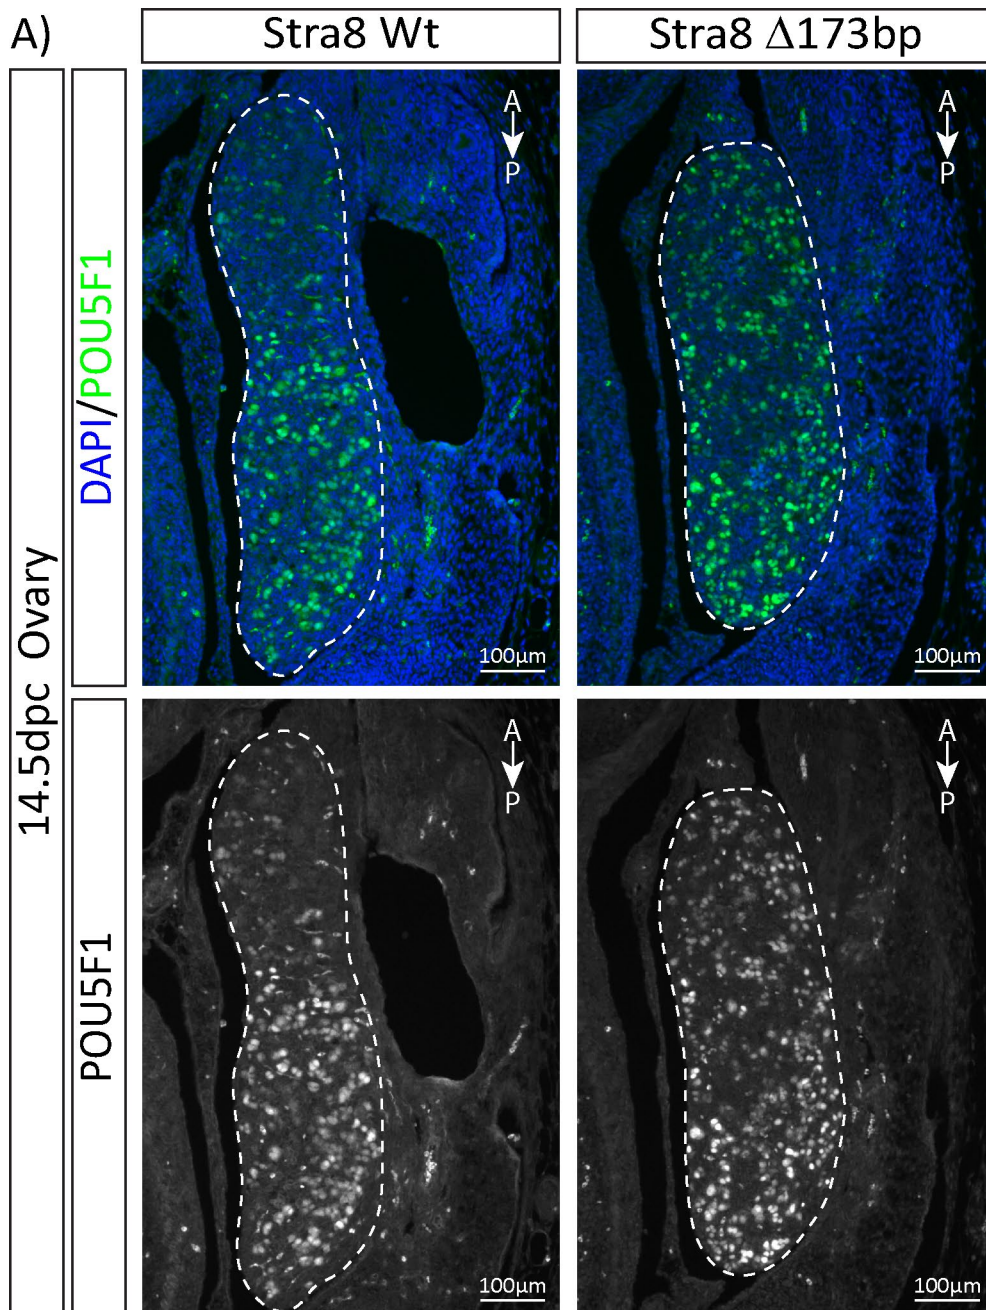

**Figure S8: Retention of POU5F1 (a.k.a. OCT4) in  $\Delta$ 173bp mutant ovaries.**

Whole mount immunofluorescence analysis shows the depletion of POU5F1 characteristic at the anterior end of wildtype 14.5 dpc ovaries. This was not observed in a homozygous  $\Delta$ 173bp littermate, where POU5F1 expression is maintained along the entire length of the ovary. This correlates with the retention of *Pou5fl* expression detected by qRT-PCR (Fig. 5B; Fig. S6D).

Figure S9

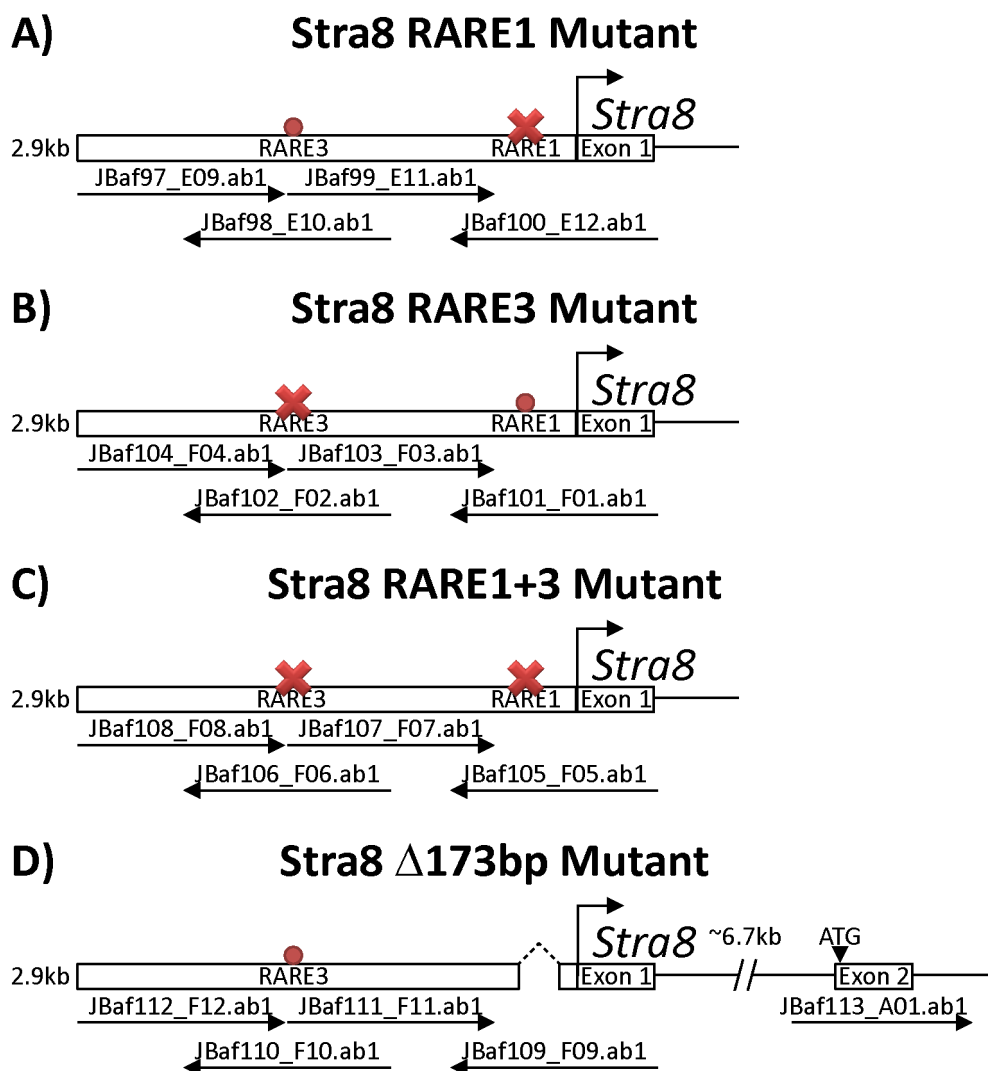

**Figure S9: Sequencing coverage of RARE1, RARE3, RARE1+3 and  $\Delta$ 173bp mutant alleles**

A-C) 2.9kb promoter and Exon 1 of RARE1, RARE3 and RARE1+3 was cloned and completely sequenced, confirming that only the intended RAREs were mutated. Full overlapping coverage was achieved using 4 primers; reads are as indicated by the black arrows under the diagram of each promoter. D) In addition to sequencing the promoter and Exon 1, the entirety of Exon 2 and flanking intronic sequences were also sequenced for the  $\Delta$ 173bp allele. Exon 2 contains the ATG transcription start site. We confirmed exon 2 to be mutation free, suggesting that it is unlikely that a null allele was inadvertently generated by mutation at that position. All sequencing chromatograms are available as Data S1 (<https://doi.org/10.6084/m9.figshare.13506966.v1>).

## Supplementary Tables

**Table S1: Sequences of oligonucleotides used for PCR amplification of genetic sequences, genotyping and SYBR-based qRT-PCR.**

| Name         | Sequence                  | Used For                                       |
|--------------|---------------------------|------------------------------------------------|
| 2.9kbStra8_F | TCTCGAGCCTTTAGACCCCAGAGC  | Amplification of ~2.9 kb <i>Stra8</i> promoter |
| Stra8_R      | GACTGCCCCGTCGCAGAATAAGAAG |                                                |
| Stra8_Fw2    | TGATTGGTTCGCAGCCTGGG      | Genotyping for Stra8-eGFP Transgene            |
| eGFP_Rv1     | CGTCGCCGTCCAGCTCGACCAG    |                                                |
| Colla1-Geno7 | CCCAGCTTCACCAGTTCAAT      | Genotyping for <i>Colla1</i> Targeting         |
| Colla1-Geno8 | TCATCAAGGAAACCCTGGAC      |                                                |
| GFP_F        | GCAGAAGAACGGCATCAAGGTG    | GFP qRT-PCR Primers                            |
| GFP_R        | CTGGGTGCTCAGGTAGTGGTTGTC  |                                                |
| DDX4_F       | CAGGAATGCCATCAAAGGAACAAC  | DDX4 qRT-PCR Primers                           |
| DDX4_R       | CCCAACAGCGACAAACAAGTAACTG |                                                |

**Table S2: Oligonucleotides sequences used for site directed mutagenesis of RARE1, RARE3 and DMRT1 binding sites on *Stra8* promoter constructs for *in vitro* luciferase assays.**

| Name                     | Oligo Sequence                                                                                                                                                                                                               | Used For                                                                                                                                            |
|--------------------------|------------------------------------------------------------------------------------------------------------------------------------------------------------------------------------------------------------------------------|-----------------------------------------------------------------------------------------------------------------------------------------------------|
| RARE1_ssODN              | GCTCCTCTATATCTCAAGAGAAAG<br>TTATAGGTGGCATTGCCCTGGTTG<br>AGGGGTGTAAGAACTGGCGCTAGC<br>CGCCTGGATGG <u>TCGACAAAATTT</u><br>TCTTGCTCCTTCCACACCCTCTTGC<br>AACCTGTGGCAAGTTGTTACAATG<br>TTTTACCAATGTCCACGCTCCCCA<br>TTGGCGCCCCACCATG | Mutation of RARE1 binding site<br>(mutated nucleotides are<br>underlined)<br><br>RARE1 <u>GGGTGAAAAGGTCA</u><br><br>Mutated <u>GTCGACAAAATTT</u>    |
| Stra8_mutRARE3_antisense | CTTTGTCTTGGAGAGCCTTGCCTG<br><u>TCGACAAATTTAATGTGGAGGTTT</u><br>GCAAACCTTG                                                                                                                                                    | Mutation of RARE3 binding site<br>(mutated nucleotides are<br>underlined)<br><br>RARE3 <u>TCCTCACAGGTCA</u><br><br>Mutated <u>TAAATTTGTCGAC</u>     |
| Stra8_mutDMRT1_antisense | GGCGCCAATGGGGAGCGTGGACAT<br>TGGTGAG <u>GGCGCGCCGGATCCCTTG</u><br>CCACAGGTTGC                                                                                                                                                 | Mutation of DMRT1 binding<br>site (mutated nucleotides are<br>underlined)<br><br>DMRT1 <u>TTGTTACAATGTTTT</u><br><br>Mutated <u>GGATCCGGCGCGCCT</u> |

**Table S3: Oligonucleotides sequences used for the generation of CRISPR/Cas9 reagents to target mutations of RARE1 and RARE3 *in vivo*.**

| Name             | Oligo Sequence                                                                                                                                                                                                        | Used For                                                                  |
|------------------|-----------------------------------------------------------------------------------------------------------------------------------------------------------------------------------------------------------------------|---------------------------------------------------------------------------|
| RARE1 -top       | CACCGGCGCTAGCCGCCTGGAT                                                                                                                                                                                                | Annealed and inserted into PX330 to generate RARE1 sgRNA template for IVT |
| RARE1 -bottom    | AAACATCCAGGCGGCTAGCGCC                                                                                                                                                                                                |                                                                           |
| RARE1_ssODN      | GCTCCTCTATATCTCAAGAGAAAG<br>TTATAGGTGGCATTGCCCTGGTTG<br>AGGGGTGTAAGAACTGGCGCTAGC<br>CGCCTGGATGGTCGACAAAATTTT<br>TCTTGCTCCTTCCACACCCTCTTGC<br>AACCTGTGGCAAGTTGTTACAATG<br>TTTTACCAATGTCCACGCTCCCCA<br>TTGGCGCCCCACCATG | HDR template for generating CRISPR/Cas9 mediated RARE1 mutation           |
| RARE3_sgRNAF     | AATACGACTCACTATAGGGGCAAA<br>CCTCCACATTCCTCACGTTTTAGAG<br>CTAGAAATAGCAAGTTAAAATAAG<br>GCTAGTC                                                                                                                          | Annealed and filled to generate template for RARE3 sgRNA IVT.             |
| Chimeric_sgRNA_R | TAAAAAAGCACCGACTCGGTGCCA<br>CTTTTTCAAGTTGATAACGGACTA<br>GCCTTATTTAACTTGCTATTTCTA<br>GCTCTAAAAC                                                                                                                        |                                                                           |
| RARE3_ssODN      | ACTAAATTAAAGGCTGAGACCTGT<br>CAGAGGTCAAAGTTTGCAAACCTC<br>CACATTAATTTGTCGACAGGACA<br>AGGCTCTCCAAGACAAAGGTTTAC<br>AGTTTCAGTACCCGTTCTGCACCC                                                                               | HDR template for generating CRISPR/Cas9 mediated RARE3 mutation           |

**Table S4: Breeding Statistics for  $\Delta 173$  heterozygous and homozygous mice**

| Number of breeders        | Average Days Setup (S.D.) | Average Days to birth of 1 <sup>st</sup> litter (S.D.) | Average number of litters (S.D.) | Average litter size (S.D.) |
|---------------------------|---------------------------|--------------------------------------------------------|----------------------------------|----------------------------|
| 16 Heterozygous (11M, 5F) | 173.55 (87.75)*           | 29.45 (12.81)                                          | 4.36 (2.31)                      | 7.11 (1.52)                |
| 8 Homozygous (4M, 4F)     | 82.75 (5.02)              | N/A                                                    | 0                                | 0                          |

\*Statistics extracted from breeding colony: breeders were allowed to breed for longer than was done for the homozygous animals. S.D. = standard deviation.
